# Supplementary material for: Removal of heavy oil from contaminated surfaces with a detergent formulation containing biosurfactants produced by Pseudomonas spp
Source: PeerJ. 2021 Nov 25;9:e12518. doi: 10.7717/peerj.12518 (PMC8627655; doi:10.7717/peerj.12518)
Supplement: Supplemental Information 1 [file peerj-09-12518-s001.xlsx]

## Sheet: Tensão P. cepacia Res. e Glu.+G
							Raw data
							Canola frying oil 2.0% plus corn steep liquor 3.0%
	Canola frying oil 2.0% plus corn steep liquor 3.0%	Standard deviation	Glucose 2.0% plus glycerol 5.0%	standard deviation			SAMPLES	28ºC		TS standart desviation	37ºC		TS standart desviation
28 °C	26.552	0.201916	54.4856	0.197628			1	26.45	26.552	0.201916	29.289	29.3672	0.25527
37 °C	29.3672	0.25527	44.1544	0.540703			2	26.4			29.772
							3	26.55			29.45
							4	26.9			29.165
							5	26.46			29.16
							Glucose 2.0% plus glycerol 5.0%
							SAMPLES	28ºC		TS standart desviation	37ºC		TS standart desviation
							1	54.15	54.4856	0.197628	44.095	44.1544	0.540703
							2	54.5			44.172
							3	54.55			44.005
							4	54.67			43.5
							5	54.558			45
