# Supplementary material for: Removal of heavy oil from contaminated surfaces with a detergent formulation containing biosurfactants produced by Pseudomonas spp
Source: PeerJ. 2021 Nov 25;9:e12518. doi: 10.7717/peerj.12518 (PMC8627655; doi:10.7717/peerj.12518)
Supplement: Supplemental Information 2 — Fermentations performed for 96 h at 200 rpm at 28 and 37 °C in media containing sucrose (A) and glucose (B). [file peerj-09-12518-s002.xlsx]

## Sheet: P. cepacia Glu. 28 e 37°C Glu
										Raw data
	Glucose 1.5 %	Deviation	Glucose 2.0 %	Deviation	Glucose 3.0 %	Deviation				Glucose 1.5 %
28 °C	40.87	0.498448	48.85	0.4272	31.6	0.565685				SAMPLES	28ºC		TS standart desviation	37ºC		TS standart desviation
37 °C	42.25	0.511994	58.37	0.281957	36.6504	0.188687				1	40.5	40.87	0.498448	42.6	42.25	0.511994
										2	41.4			42.3
										3	41.43			42.5
										4	40.55			42.495
										5	40.47			41.355
										Glucose 2.0%
										SAMPLES	28ºC		TS standart desviation	37ºC		TS standart desviation
										1	48.8	48.85	0.4272	58.4	58.37	0.281957
										2	48.6			58.2
										3	49.6			58.2
										4	48.6			58.85
										5	48.65			58.2
										Glucose 3.0%
										SAMPLES	28ºC		TS standart desviation	37ºC		TS standart desviation
										1	31.4	31.6	0.565685	36.87	36.6504	0.188687
										2	31.4			36.43
										3	31.2			36.816
										4	32.6			36.52
										5	31.4			36.616
