# Supplementary material for: Removal of heavy oil from contaminated surfaces with a detergent formulation containing biosurfactants produced by Pseudomonas spp
Source: PeerJ. 2021 Nov 25;9:e12518. doi: 10.7717/peerj.12518 (PMC8627655; doi:10.7717/peerj.12518)
Supplement: Supplemental Information 3 — Fermentations performed in media containing glycerol plus glucose, hexadecane plus glucose and molasses plus corn steep liquor at 28 °C (A) and 35 °C (B). [file peerj-09-12518-s003.xlsx]

## Sheet: P. aerugin UCP0992 Sa 28 e 37°C
	Sucrose 2.0 % (p/v)	Standard deviation	Sucrose 3.0 % (p/v)	Standard deviation						Raw data
28 °C	37.48	0.178885	54.152	0.352307						Sucrose 2.0 %
37 °C	47.65	0.15	59.2616	0.433466						SAMPLES	28ºC		TS standart desviation	37ºC		TS standart desviation
										1	37.5	37.48	0.178885	47.8	47.65	0.15
										2	37.7			47.7
										3	37.5			47.65
										4	37.2			47.7
										5	37.5			47.4
										Sucrose 3.0%
										SAMPLES	28ºC		TS standart desviation	37ºC		TS standart desviation
										1	54	54.152	0.352307	59.4	59.2616	0.433466
										2	54.12			59.38
										3	54.74			59.44
										4	54.1			59.588
										5	53.8			58.5

## Sheet: P. aerugin UCP0992 Gl 28 e 37°C
	Glucose 1.5 % (p/v)	standard deviation	Glucose 2.0 % (p/v)	Standard deviation	Glucose 3.0 % (p/v)	Standard deviation
28 °C	37.024	0.205743	50.583	0.33056	53.22	0.178885			Raw data
37 °C	45.76	0.167332	65.04	0.219089	59.012	0.206688			Glucose 1.5 %
									SAMPLES	28ºC		TS standart desviation	37ºC		TS standart desviation
									1	37	37.024	0.205743	45.8	45.76	0.167332
									2	37			45.8
									3	37.16			45.6
									4	36.71			45.6
									5	37.25			46
									Glucose 2.0%
									SAMPLES	28ºC		TS standart desviation	37ºC		TS standart desviation
									1	50.48	50.583	0.33056	65	65.04	0.219089
									2	50.58			64.8
									3	50.74			65.4
									4	50.11			65
									5	51.005			65
									Glucose 3.0%
									SAMPLES	28ºC		TS standart desviation	37ºC		TS standart desviation
									1	53	53.22	0.178885	59	59.012	0.206688
									2	53.1			59.2
									3	53.4			59.2
									4	53.2			58.96
									5	53.4			58.7
