# Supplementary material for: Removal of heavy oil from contaminated surfaces with a detergent formulation containing biosurfactants produced by Pseudomonas spp
Source: PeerJ. 2021 Nov 25;9:e12518. doi: 10.7717/peerj.12518 (PMC8627655; doi:10.7717/peerj.12518)
Supplement: Supplemental Information 4 [file peerj-09-12518-s004.xlsx]

## Sheet: P. aer. ATCC9027 e 10145 28°C  
	Glycerol 5.0 % plus glucose 2.0 %	Deviation	N-hexadecane 1.0% plus Glucose 1.0%	Deviation	Molasses 2.0% plus corn steep liquor 3.0%	Desviation			Raw data
Pseudomonas aeruginosa ATCC 10145	25.3	0.574456	45.924	0.307701	40.4772	0.151126			Glycerol 5.0 % plus glucose 2.0 %
Pseudomonas aeruginosa ATCC 9027	28.112	0.543572	31.96	0.219089	44.9356	0.437123			SAMPLES	ATCC 10145		TS standart deviation	ATCC 9027		TS standart deviation
									1	25.4	25.3	0.574456	28.95	28.112	0.543572
									2	24.5			27.8
									3	26			28.2
									4	25			27.5
									5	25.6			28.11
									N-hexadecane 1.0% plus Glucose 1.0%
									SAMPLES	ATCC 10145		TS standart deviation	ATCC 9027		TS standart deviation
									1	45.74	45.924	0.307701	32.2	31.96	0.219089
									2	45.72			32.2
									3	46.46			31.8
									4	45.8			31.8
									5	45.9			31.8
									Molasses 2.0% plus corn steep liquor 3.0%
									SAMPLES	ATCC 10145		TS standart desviation	ATCC 9027		TS standart desviation
									1	40.6	40.4772	0.151126	45	44.9356	0.437123
									2	40.4			44.18
									3	40.3			45.3
									4	40.42			45.06
									5	40.666			45.138

## Sheet: P. aer. ATCC9027 e 10145 35°C
	Glycerol 5.0 % plus Glucose 2.0 %	Deviation	N-hexadecane 1.0% plus glucose 1.0%	Deviation	Molasses 2.0% plus corn steep liquor 3.0%	Deviation					Raw data
Pseudomonas aeruginosa ATCC 10145	25.4	0.616441	48.12	0.339411	42.18	0.158114					Glycerol 5.0 % plus Glucose 2.0 %
Pseudomonas aeruginosa ATCC 9027	30.624	0.483818	42.64	0.2	48.9548	0.355474					SAMPLES	ATCC 10145		TS standart deviation	ATCC 9027		TS standart deviation
											1	25.4	25.4	0.616441	30.82	30.624	0.483818
											2	26			31
											3	26			30.82
											4	24.6			30.7
											5	25			29.78
											N-hexadecane 1.0% plus glucose 1.0%
											SAMPLES	ATCC 10145		TS standart deviation	ATCC 9027		TS standart deviation
											1	48.6	48.12	0.339411	42.44	42.64	0.2
											2	47.64			42.84
											3	48.12			42.84
											4	48.12			42.44
											5	48.12			42.64
											Molasses 2.0% plus corn steep liquor 3.0%
											SAMPLES	ATCC 10145		TS standart deviation	ATCC 9027		TS standart deviation
											1	42.08	42.18	0.158114	48.982	48.9548	0.355474
											2	42.28			48.9885
											3	42.38			48.412
											4	41.98			48.9801
											5	42.18			49.4112
