# Supplementary material for: Removal of heavy oil from contaminated surfaces with a detergent formulation containing biosurfactants produced by Pseudomonas spp
Source: PeerJ. 2021 Nov 25;9:e12518. doi: 10.7717/peerj.12518 (PMC8627655; doi:10.7717/peerj.12518)
Supplement: Supplemental Information 5 [file peerj-09-12518-s005.xlsx]

## Sheet: Emulsão ATCCs 28°C
	Pseudomonas aeruginosa ATCC 10145 e 9027 / Glycerol and glucose
	Emulsão
	Soybean	Deviation	Corn oil	Deviation	Motor oil	Deviation				Raw data
Pseudomonas aeruginosa ATCC 10145	50.1	0.223607	55.2	1.78885	97.5	2.17945				Glycerol plus Glucose (Soybean)
Pseudomonas aeruginosa ATCC 9027	70	0.707107	52.8	1.64317	43.4	1.51658				SAMPLES	ATCC 10145		standart deviation	ATCC 9027		standart deviation
										1	50	50.1	0.223607	69	70	0.707107
										2	50			70
										3	50			70
										4	50			70
										5	50.5			71
										Glycerol plus Glucose (Corn Oil)
										SAMPLES	ATCC 10145		standart deviation	ATCC 9027		standart deviation
										1	55	55.2	1.78885	52	52.8	1.64317
										2	57			51
										3	53			55
										4	57			52
										5	54			54
										Glycerol plus Glucose (Motor Oil)
										SAMPLES	ATCC 10145		standart deviation	ATCC 9027		standart deviation
										1	98	97.5	2.17945	41	43.4	1.51658
										2	95			44
										3	95.5			43
										4	100			44
										5	99			45
