# Supplementary material for: Removal of heavy oil from contaminated surfaces with a detergent formulation containing biosurfactants produced by Pseudomonas spp
Source: PeerJ. 2021 Nov 25;9:e12518. doi: 10.7717/peerj.12518 (PMC8627655; doi:10.7717/peerj.12518)
Supplement: Supplemental Information 6 [file peerj-09-12518-s006.xlsx]

## Sheet: Dispersão ATCCs 28 °C
	Pseudomonas aeruginosa ATCC 10145 e 9027 / Glycerol and glucose
	1:2	Deviation	1:8	Deviation	1:25	Deviation				Raw data
Pseudomonas aeruginosa ATCC 10145	99.22	0.5	75	2	79.3	3.38				Glycerol plus Glucose (1:2)
Pseudomonas aeruginosa ATCC 9027	66.24	0.7	62	2	65	2				SAMPLES	ATCC 10145		standart deviation	ATCC 9027		standart deviation
										1	99.1	99.22	0.464489	66.4	66.24	0.74027
										2	98.9			66.8
										3	99.25			66.2
										4	98.85			66.8
										5	100			65
										Glycerol plus Glucose (1:8)
										SAMPLES	ATCC 10145		standart deviation	ATCC 9027		standart deviation
										1	75	74.912	1.82174	62	62.16	1.51921
										2	75			62
										3	77			64.6
										4	72			60.4
										5	75.56			61.8
										Glycerol plus Glucose (1:25)
										SAMPLES	ATCC 10145		standart deviation	ATCC 9027		standart deviation
										1	84	79.3	2.90689	66.5	64.8	1.68077
										2	78.5			62
										3	79			65.5
										4	76			65
										5	79			65
